# Supplementary material for: Phenylpropanoid Biosynthesis Gene Expression Precedes Lignin Accumulation During Shoot Development in Lowland and Upland Switchgrass Genotypes
Source: Front Plant Sci. 2021 Aug 9;12:640930. doi: 10.3389/fpls.2021.640930 (PMC8380989; doi:10.3389/fpls.2021.640930)
Supplement: Supplementary Table 2 — Significant correlations among cell wall components. [file Table_2.XLSX]

## Sheet: Correlation Comparisons
Table S2. Significant correlations among cell wall traits across the three switchgrass genotypes and six sample types by Gini (GCC), Pearson (PCC), and Spearman (SCC) correlation methods.
Correlations highlighted in yellow were significant in GCC, but not in PCC or in SCC. However, each correlation detected by GCC was detected in either one or the other of the more traditional correlation methods.
Citation: Saha, Lin et al. FIPS 2021
CW	CW	GCC	GCC p-value	GCC q-value		PCC	PCC p-value	PCC q-value		SCC	SCC p-value	SCC q-value
Ara	Gal	0.725489	0.001	0.00258621		0.747995	8.02634e-11	7.85185e-10		0.707642	2.18997e-09	1.69912e-08
Ara	Glu	0.632077	0.001	0.00258621		0.613457	8.13657e-07	5.23066e-06		0.613188	8.25225e-07	4.31804e-06
Ara	Xyl	0.570127	0.001	0.00258621		0.530996	3.61515e-05	0.000166002		0.570192	6.7663e-06	2.98513e-05
Ara	FA	0.445402	0.001	0.00258621		0.464945	0.000396877	0.00146389		0.401105	0.00264826	0.00701011
Ara	pCA	0.424867	0.002	0.00494505		0.396014	0.00303443	0.00886684		0.388679	0.00367823	0.0092989
ED16h	ED24h	0.970974	0.001	0.00258621		0.963916	1.47452e-31	1.74614e-30		0.964531	9.49731e-32	1.257e-30
ED16h	ED8h	0.959929	0.001	0.00258621		0.94901	9.85035e-28	1.05539e-26		0.959767	2.37429e-30	2.81166e-29
ED16h	Rhm	-0.438406	0.004	0.00947368						-0.467972	0.000359308	0.00113865
ED16h	Gal	-0.456587	0	0		-0.421104	0.00151953	0.00510289		-0.446969	0.000703338	0.00214318
ED16h	fucose	-0.655668	0	0		-0.546082	1.94441e-05	9.30833e-05		-0.616783	6.82274e-07	3.74419e-06
ED16h	pCA	-0.69394	0	0		-0.625747	4.20144e-07	2.86462e-06		-0.642627	1.6154e-07	9.82341e-07
ED16h	Lignin	-0.729341	0	0		-0.654033	8.18701e-08	5.94218e-07		-0.723513	6.39266e-10	6.25369e-09
ED24h	ED16h	0.970974	0.001	0.00258621		0.963916	1.47452e-31	1.74614e-30		0.964531	9.49731e-32	1.257e-30
ED24h	ED8h	0.962664	0.001	0.00258621		0.965821	3.68382e-32	4.87564e-31		0.957538	9.38726e-30	1.00578e-28
ED24h	Rhm	-0.42905	0.001	0.00258621						-0.469792	0.00033829	0.00110312
ED24h	Gal	-0.446296	0.003	0.00725806		-0.409438	0.00210967	0.00668557		-0.446465	0.000714394	0.00214318
ED24h	fucose	-0.610089	0	0		-0.520434	5.48503e-05	0.000241987		-0.575148	5.39011e-06	2.52794e-05
ED24h	pCA	-0.62004	0	0		-0.559742	1.0801e-05	5.4005e-05		-0.57469	5.5053e-06	2.52794e-05
ED24h	Lignin	-0.694233	0	0		-0.612296	8.64822e-07	5.25906e-06		-0.686831	9.78421e-09	6.67105e-08
ED8h	ED24h	0.962664	0.001	0.00258621		0.965821	3.68382e-32	4.87564e-31		0.957538	9.38726e-30	1.00578e-28
ED8h	ED16h	0.959929	0.001	0.00258621		0.94901	9.85035e-28	1.05539e-26		0.959767	2.37429e-30	2.81166e-29
ED8h	Gal	-0.440601	0.001	0.00258621		-0.407729	0.00221142	0.00681603		-0.440747	0.000851242	0.0024874
ED8h	Rhm	-0.466609	0.001	0.00258621						-0.494645	0.00014354	0.000482038
ED8h	pCA	-0.616822	0	0		-0.579574	4.38535e-06	2.40659e-05		-0.56882	7.20139e-06	3.05719e-05
ED8h	fucose	-0.659903	0	0		-0.5629	9.39321e-06	4.91505e-05		-0.625081	4.3578e-07	2.51411e-06
ED8h	Lignin	-0.718793	0	0		-0.660493	5.49995e-08	4.2672e-07		-0.711073	1.6899e-09	1.52091e-08
FA	Glu	0.589178	0.001	0.00258621		0.439388	0.00088705	0.00316803		0.496322	0.000135147	0.000467818
FA	pCA	0.541389	0.001	0.00258621		0.496072	0.00013637	0.000578929		0.522165	5.12762e-05	0.000189134
FA	Ara	0.445402	0.001	0.00258621		0.464945	0.000396877	0.00146389		0.401105	0.00264826	0.00701011
fucose	Lignin	0.738045	0.001	0.00258621		0.692423	6.62453e-09	5.52044e-08		0.708329	2.07994e-09	1.69912e-08
fucose	Rhm	0.643527	0.001	0.00258621						0.70566	2.53954e-09	1.84321e-08
fucose	Gal	0.623585	0.001	0.00258621		0.586032	3.22798e-06	1.8623e-05		0.606861	1.14689e-06	5.73445e-06
fucose	pCA	0.458245	0.001	0.00258621		0.466701	0.000374667	0.00142881		0.532152	3.45095e-05	0.000131604
fucose	GlcA	0.454133	0.001	0.00258621		0.478059	0.000256199	0.00101131
fucose	ED24h	-0.610089	0	0		-0.520434	5.48503e-05	0.000241987		-0.575148	5.39011e-06	2.52794e-05
fucose	ED16h	-0.655668	0	0		-0.546082	1.94441e-05	9.30833e-05		-0.616783	6.82274e-07	3.74419e-06
fucose	ED8h	-0.659903	0	0		-0.5629	9.39321e-06	4.91505e-05		-0.625081	4.3578e-07	2.51411e-06
Gal	Ara	0.725489	0.001	0.00258621		0.747995	8.02634e-11	7.85185e-10		0.707642	2.18997e-09	1.69912e-08
Gal	fucose	0.623585	0.001	0.00258621		0.586032	3.22798e-06	1.8623e-05		0.606861	1.14689e-06	5.73445e-06
Gal	Lignin	0.48024	0.001	0.00258621		0.484425	0.000205839	0.000842068		0.514084	7.00133e-05	0.000250048
Gal	pCA	0.440357	0.001	0.00258621		0.418255	0.00164808	0.00537417
Gal	Glu	0.426992	0.001	0.00258621		0.423644	0.00141255	0.0048896		0.391576	0.00341081	0.00882107
Gal	Xyl	0.426293	0.002	0.00494505						0.411473	0.00199397	0.00540535
Gal	Rhm	0.417749	0.001	0.00258621						0.433429	0.00106065	0.00302084
Gal	ED8h	-0.440601	0.001	0.00258621		-0.407729	0.00221142	0.00681603		-0.440747	0.000851242	0.0024874
Gal	ED24h	-0.446296	0.003	0.00725806		-0.409438	0.00210967	0.00668557		-0.446969	0.000703338	0.00214318
Gal	ED16h	-0.456587	0	0		-0.421104	0.00151953	0.00510289		-0.446465	0.000714394	0.00214318
GalA	Glu	0.589322	0.001	0.00258621		0.402053	0.00258139	0.00774416
GlcA	Rhm	0.478217	0.001	0.00258621						0.417115	0.00170221	0.00472836
GlcA	fucose	0.454133	0.001	0.00258621		0.478059	0.000256199	0.00101131
Glu	Ara	0.632077	0.001	0.00258621		0.613457	8.13657e-07	5.23066e-06		0.613188	8.25225e-07	4.31804e-06
Glu	GalA	0.589322	0.001	0.00258621		0.402053	0.00258139	0.00774416
Glu	FA	0.589178	0.001	0.00258621		0.439388	0.00088705	0.00316803		0.496322	0.000135147	0.000467818
Glu	Xyl	0.487477	0.001	0.00258621						0.537183	2.81331e-05	0.000111052
Glu	Gal	0.426992	0.001	0.00258621		0.423644	0.00141255	0.0048896		0.391576	0.00341081	0.00882107
Lignin	pCA	0.753545	0.001	0.00258621		0.741285	1.45032e-10	1.30529e-09		0.672194	2.60963e-08	1.67762e-07
Lignin	fucose	0.738045	0.001	0.00258621		0.692423	6.62453e-09	5.52044e-08		0.708329	2.07994e-09	1.69912e-08
Lignin	Rhm	0.556005	0.001	0.00258621						0.550524	1.61058e-05	6.58874e-05
Lignin	Gal	0.48024	0.001	0.00258621		0.484425	0.000205839	0.000842068		0.514084	7.00133e-05	0.000250048
Lignin	ED24h	-0.694233	0	0		-0.612296	8.64822e-07	5.25906e-06		-0.686831	9.78421e-09	6.67105e-08
Lignin	ED8h	-0.718793	0	0		-0.660493	5.49995e-08	4.2672e-07		-0.711073	1.6899e-09	1.52091e-08
Lignin	ED16h	-0.729341	0	0		-0.654033	8.18701e-08	5.94218e-07		-0.723513	6.39266e-10	6.25369e-09
pCA	Lignin	0.753545	0.001	0.00258621		0.741285	1.45032e-10	1.30529e-09		0.672194	2.60963e-08	1.67762e-07
pCA	FA	0.541389	0.001	0.00258621		0.496072	0.00013637	0.000578929		0.522165	5.12762e-05	0.000189134
pCA	fucose	0.458245	0.001	0.00258621		0.466701	0.000374667	0.00142881		0.532152	3.45095e-05	0.000131604
pCA	Gal	0.440357	0.001	0.00258621		0.418255	0.00164808	0.00537417
pCA	Ara	0.424867	0.002	0.00494505		0.396014	0.00303443	0.00886684		0.388679	0.00367823	0.0092989
pCA	ED8h	-0.616822	0	0		-0.579574	4.38535e-06	2.40659e-05		-0.56882	7.20139e-06	3.05719e-05
pCA	ED24h	-0.62004	0	0		-0.559742	1.0801e-05	5.4005e-05		-0.57469	5.5053e-06	2.52794e-05
pCA	ED16h	-0.69394	0	0		-0.625747	4.20144e-07	2.86462e-06		-0.642627	1.6154e-07	9.82341e-07
Rhm	fucose	0.643527	0.001	0.00258621						0.70566	2.53954e-09	1.84321e-08
Rhm	Lignin	0.556005	0.001	0.00258621						0.550524	1.61058e-05	6.58874e-05
Rhm	GlcA	0.478217	0.001	0.00258621						0.433429	0.00106065	0.00302084
Rhm	Gal	0.417749	0.001	0.00258621						0.417115	0.00170221	0.00472836
Rhm	ED24h	-0.42905	0.001	0.00258621						-0.494645	0.00014354	0.000482038
Rhm	ED16h	-0.438406	0.004	0.00947368						-0.469792	0.00033829	0.00110312
Rhm	ED8h	-0.466609	0.001	0.00258621						-0.467972	0.000359308	0.00113865
Xyl	Ara	0.570127	0.001	0.00258621		0.530996	3.61515e-05	0.000166002		0.570192	6.7663e-06	2.98513e-05
Xyl	Glu	0.487477	0.001	0.00258621						0.537183	2.81331e-05	0.000111052
Xyl	Gal	0.426293	0.002	0.00494505						0.411473	0.00199397	0.00540535
Count		80				62				74
